# Supplementary material
Source: publisher figshare collection journal article supplement (https://gsajournals.figshare.com/ndownloader/files/32400479)
Supplement: Supplementary file 1 [file 32400479]

**Supplementary Table 4.** Antibodies used in this study.

| Primary Antigen | Name | Antibody Description | Dilution | References |
| --- | --- | --- | --- | --- |
| SdY | Sexually dimorphic on the Y | Mouse monoclonal / Clone 3I13 | IF (1 to 1000); | Bertho et al |
| FLAG | FLAG tag | Mouse monclonal (Clone M2) | WB (1 to 5000), IP (1 to 300) | Sigma Aldrich (F3165) |
